# Supplementary material for: K-Ras stabilization by estrogen via PKCδ is involved in endometrial tumorigenesis
Source: PubMed Central journal article supplement (PMC4673268; doi:10.18632/oncotarget.4049), 2015-05-08
Supplement: oncotarget-06-21328-s001.pdf [file oncotarget-06-21328-s001.pdf]

# K-Ras stabilization by estrogen via PKC $\delta$ is involved in endometrial tumorigenesis

## SUPPLEMENTAL MATERIAL

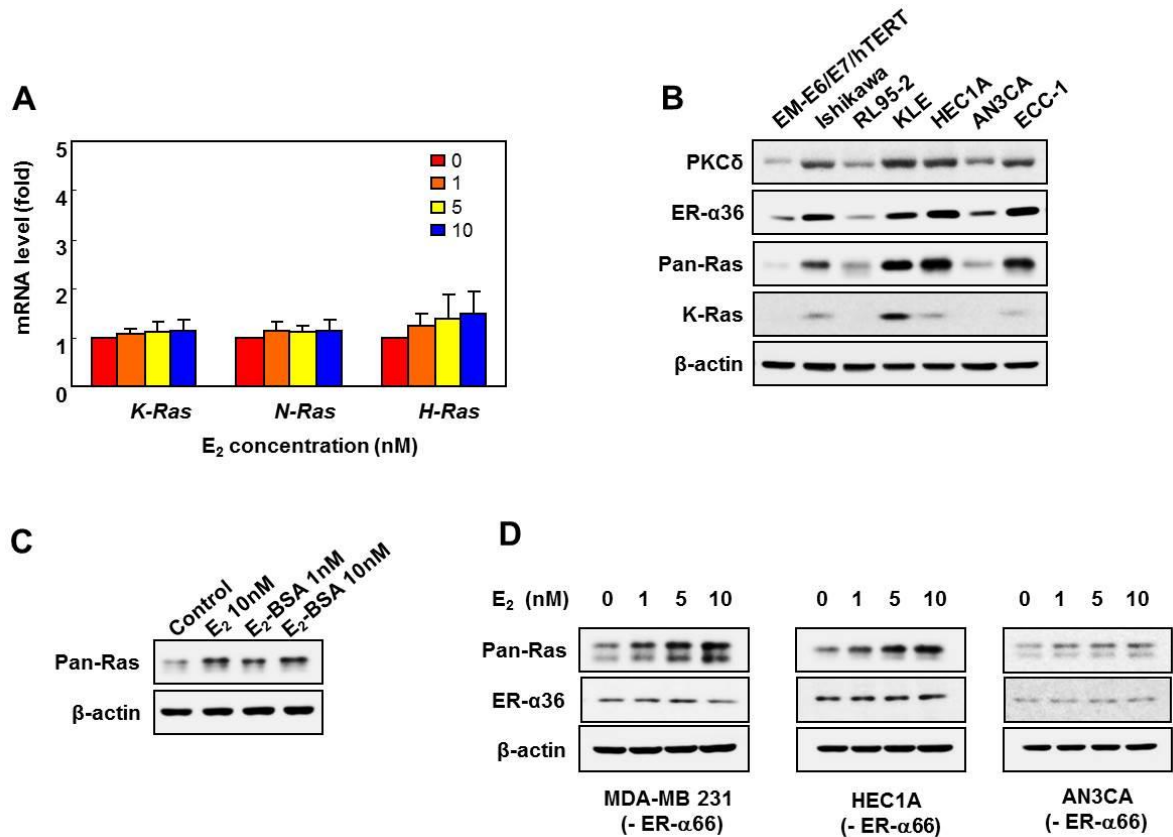

### Supplementary Figure 1 : Ras protein is stabilized, but not mRNA, by E<sub>2</sub> via ER- $\alpha$ 36.

(A) Quantitative PCR analysis of the mRNA expression of *K-Ras*, *N-Ras*, and *H-Ras* in Ishikawa cells treated with E<sub>2</sub> in a dose-dependent manner for 24 h. The results represent the mean  $\pm$  SD shown for five independent experiments. (B) WCLs of normal endometrial and EC cell lines were analyzed by western blot analysis. (C) Ishikawa cells were treated with E<sub>2</sub> or BSA-E<sub>2</sub> for 24 h. (D) MDA-MB231, HEC1A, and AN3CA cells were treated E<sub>2</sub> in a dose-dependent manner for 24 h. WCLs were analyzed by western blot analysis (B-D).

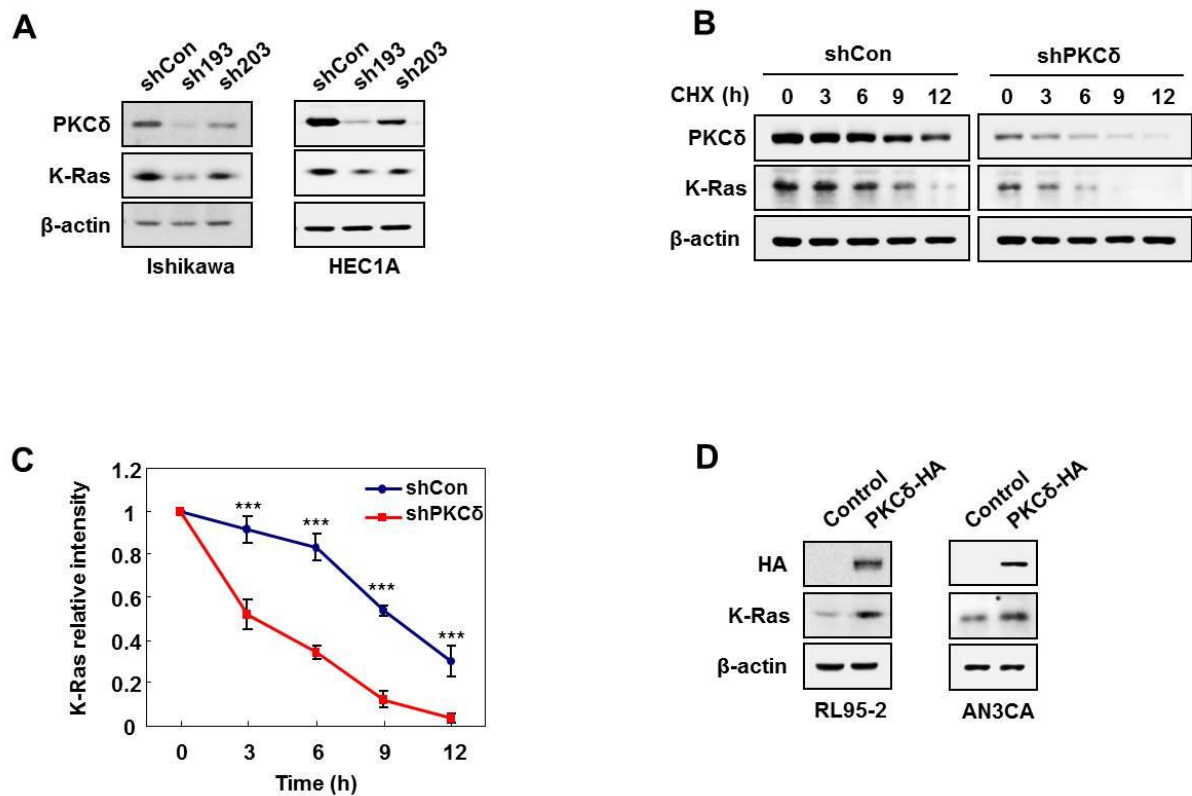

**Supplementary Figure 2 : Effect of PKCδ on K-Ras protein level.** (A) Ishikawa and HEC1A cell lines were infected PKCδ knockdown virus and established stable cell lines. (B) Stable shCon or shPKCδ Ishikawa cells were treated with CHX (50 μg/ml) for the indicated time periods. (C) The graph shows the quantification of the K-Ras band intensities of the blot (B) relative to β-actin control. Band intensity of each protein was normalized to that of 0 h in shCon or shPKCδ, and the results represent the mean ± SD (n = 3). \*\*\*  $P < 0.005$  compared with shCon. (D) RL95-2 and AN3CA cells were transfected with pHACE-PKCδ. WCLs were analyzed by western blot analysis (A, B, D).

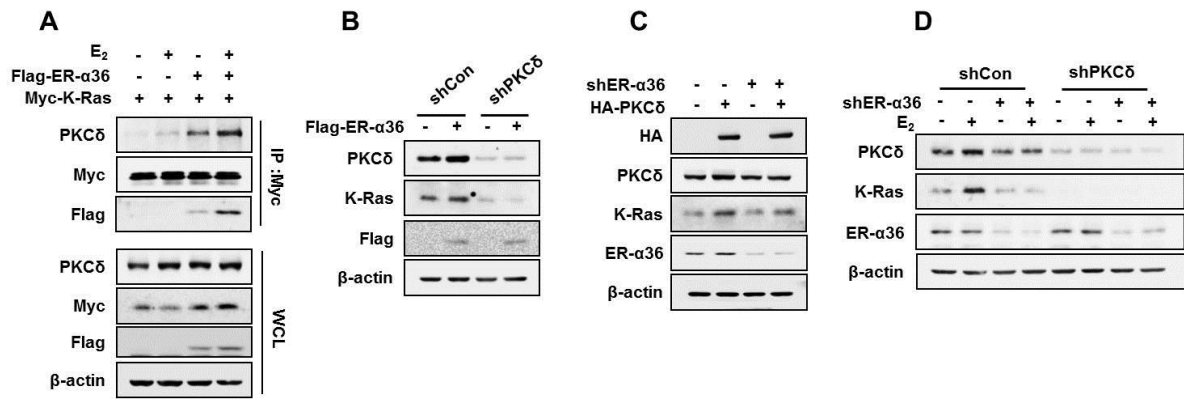

**Supplementary Figure 3 : PKC $\delta$  is downstream of ER- $\alpha$ 36 on E<sub>2</sub>-mediated K-Ras stabilization.** (A) Ishikawa cells were transfected with pCDNA3.1-Myc-K-Ras together with pCMV-Flag-ER- $\alpha$ 36, and after 1 day, were treated with/without E<sub>2</sub> (10 nM) for 30 min. WCLs were immunoprecipitated with anti-Myc antibody. (B) The stable shPKC $\delta$  Ishikawa cells were transfected with pCMV or pCMV-Flag-ER- $\alpha$ 36. (C) Ishikawa cells were transfected with the pHACE-PKC $\delta$  WT together with shER- $\alpha$ 36 (#3). (D) The stable shCon or shPKC $\delta$  Ishikawa cells were transfected with the control shRNA (shCon) or shER- $\alpha$ 36 (#3) and after 1 day, the cells were treated with/without E<sub>2</sub> (10 nM) for 24 h. WCLs were analyzed by western blot analysis (A-D).

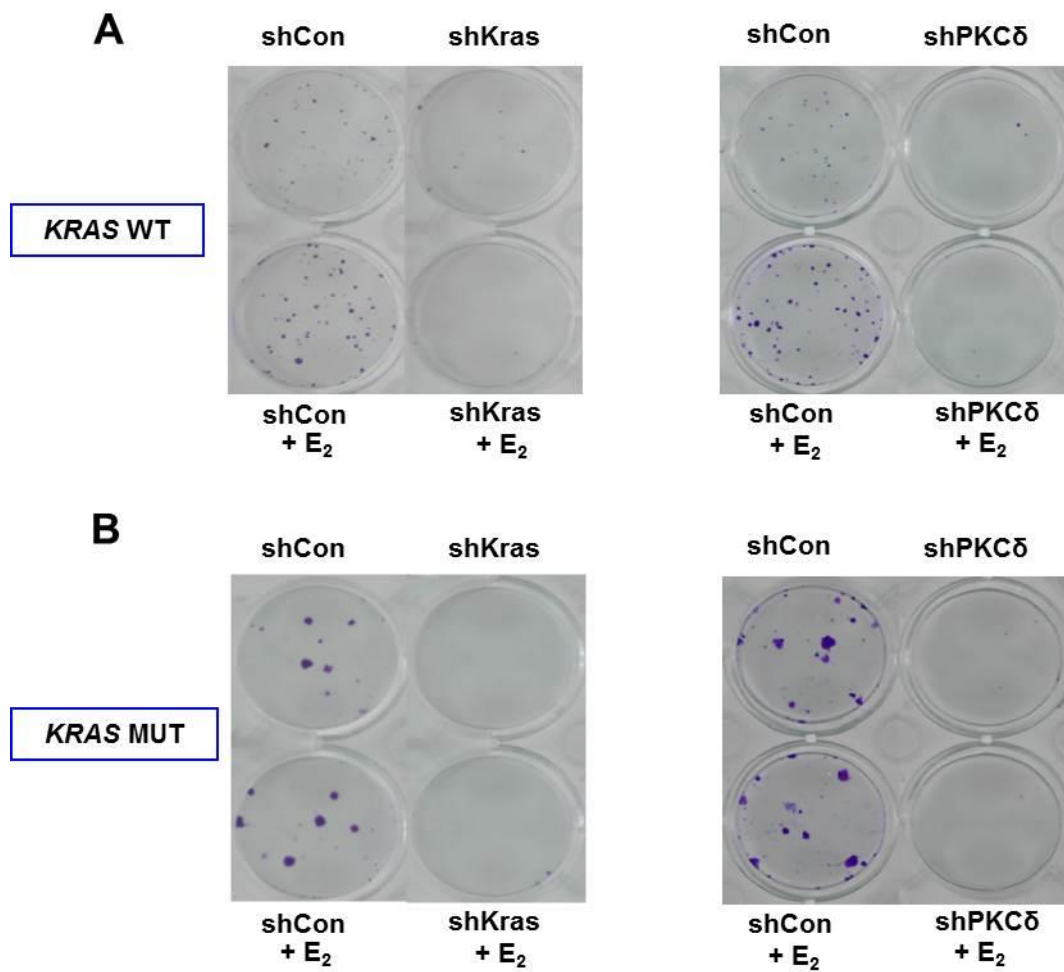

**Supplementary Figure 4** : Stable shCon, shK-Ras and shPKC $\delta$  (A) Ishikawa and (B) HEC1A cell lines were grown with/without E<sub>2</sub> (10 nM) for 14 days. Pictures of crystal violet-stained transformed colonies are shown.

**Supplementary Table 1: Primers and siRNA sequences for PKC isotypes**

| gene           | primers                       |
|----------------|-------------------------------|
| PKC $\alpha$   | 5' -CGGGCTTTTCAGATCCTTATGT-3' |
|                | 5' -CAGAGGGACTGATGACTTTGTT-3' |
| PKC $\delta$   | 5' -ACCATAAATGCCGGGAGAAG-3'   |
|                | 5' -GATGCCCTTGCTGTGTAGAA-3'   |
| PKC $\epsilon$ | 5' -CCGTACCTTACCCAACTCTACT-3' |
|                | 5' -CCTCCTGGTTGATCTGCTTTAC-3' |
| PKC $\zeta$    | 5' -GGTGCATGATGACGAGGATATT-3' |
|                | 5' -CGTAGTCTGTGAGCTTGATGTG-3' |

| gene                      | target sequence                    |
|---------------------------|------------------------------------|
| PKC $\alpha$ (NM002737)   | 5' -GUCACAGUACGAGAUGCAA-3'         |
|                           | 5' -CAACGUACCCAUUCCGGAA-3'         |
| PKC $\delta$ (NM212539)   | 5' -CCAUGUAUCCUGAGUGGAA-3'         |
|                           | 5' -AAAGAACGCUUCAACAUCG-3'         |
| PKC $\epsilon$ (NM005400) | 5' -AAGAUCAAAAUCUGCGAGGCC-3'       |
|                           | 5' -AAGAUCGAGCUGGCUGUCUUU-3'       |
| PKC $\zeta$ (NM002744)    | 5' -GGAGACAGAUGGAAUUGC UUACA UU-3' |
|                           | 5' -GUUCGAAGGCUUUGAGUAU AU-3'      |
